# Supplementary material for: Reactive oxygen species delay control of lymphocytic choriomeningitis virus
Source: PubMed Central journal article supplement — Cell Death Differ. 2013 Jan 18;20(4):649–58. doi: 10.1038/cdd.2012.167 (PMC3595491; doi:10.1038/cdd.2012.167), 2013-01-18

# Supplementary Figure S1

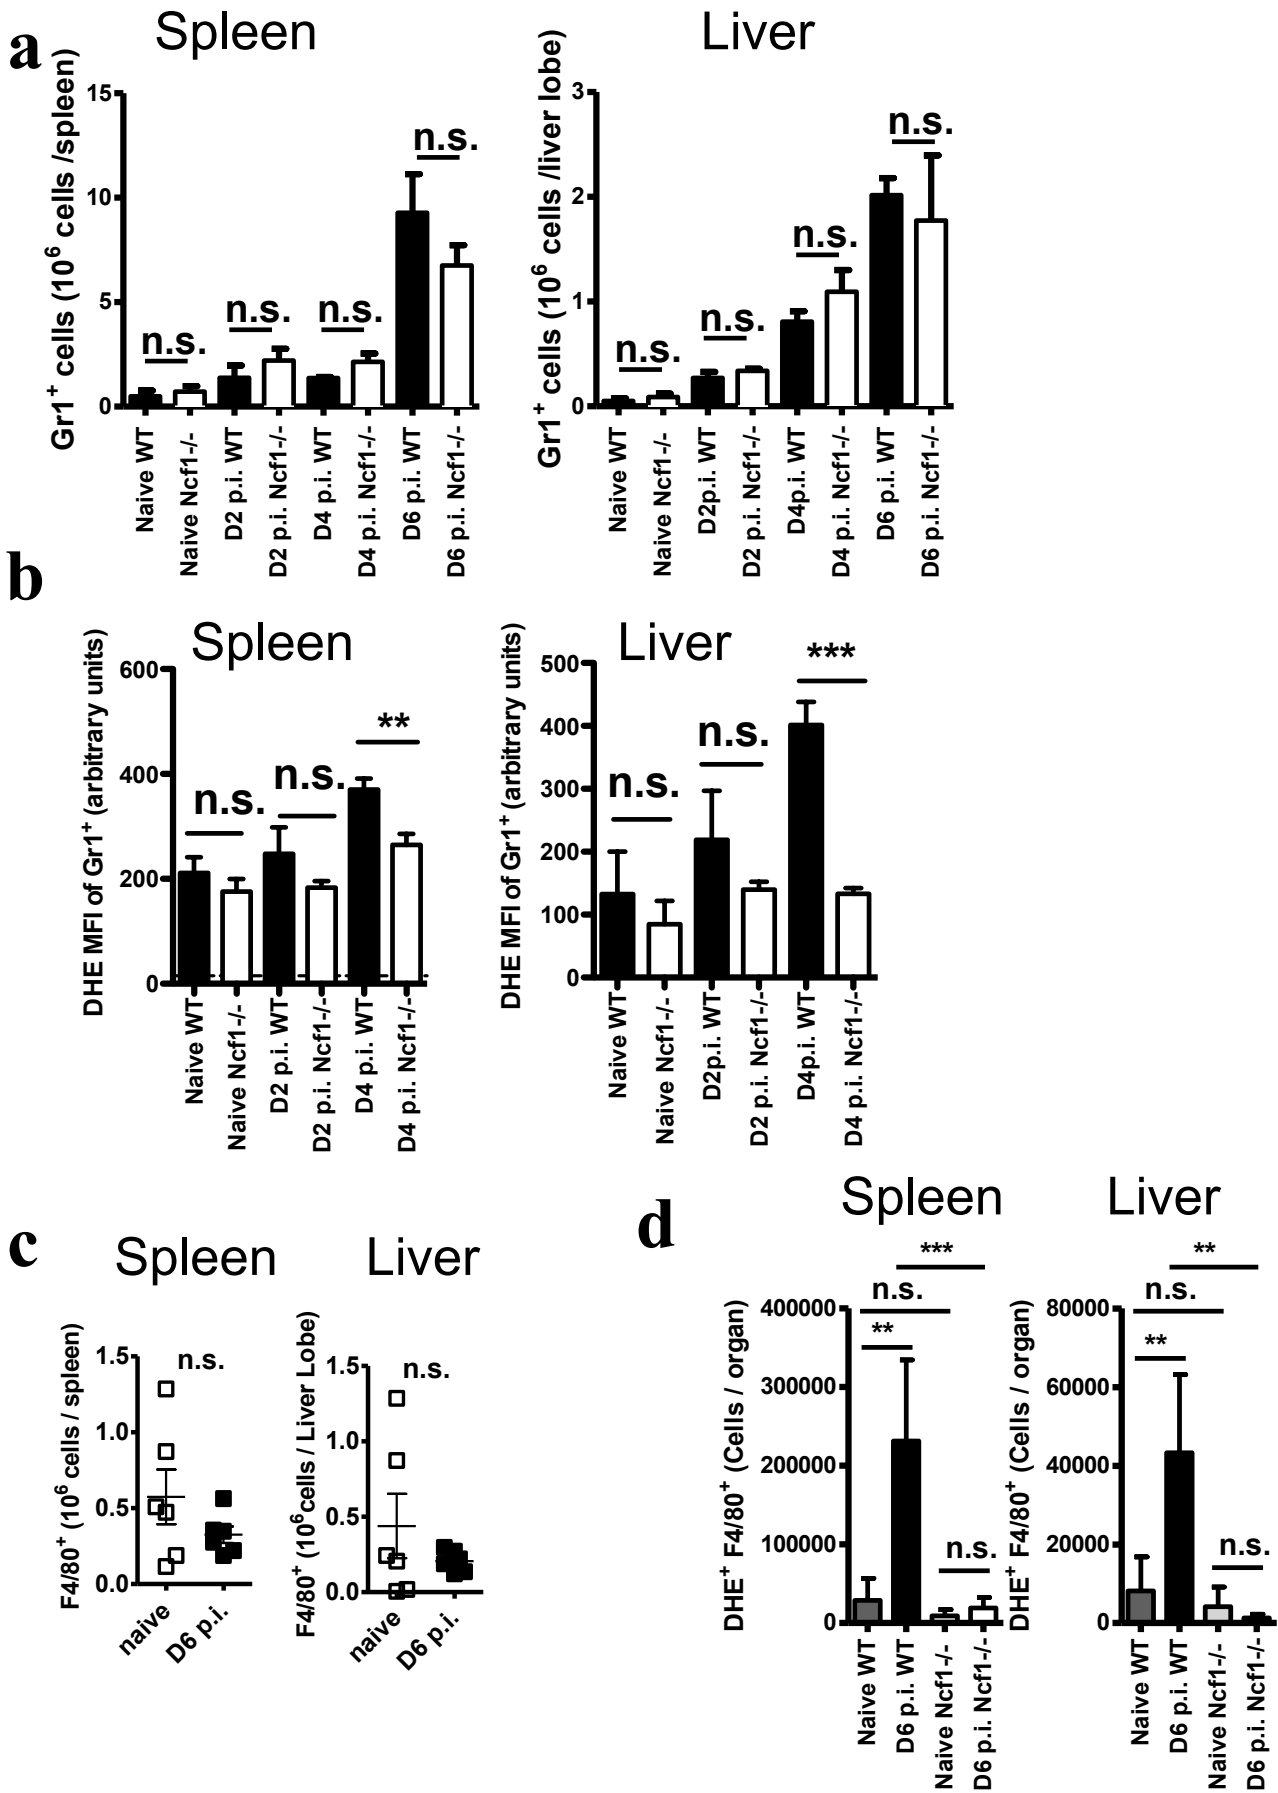

# Supplementary Figure S2

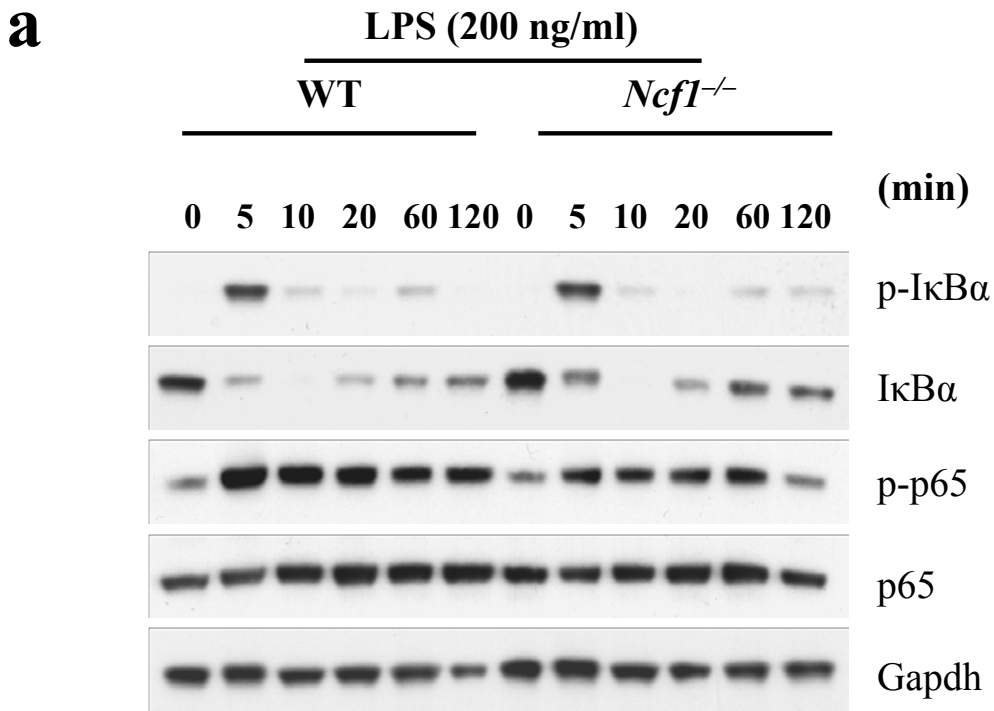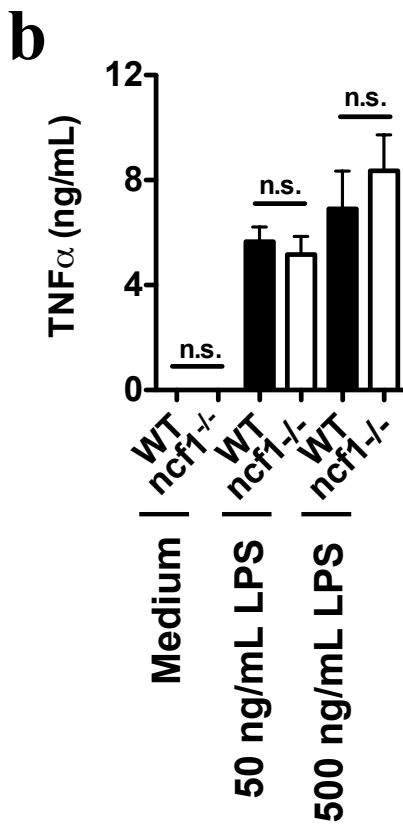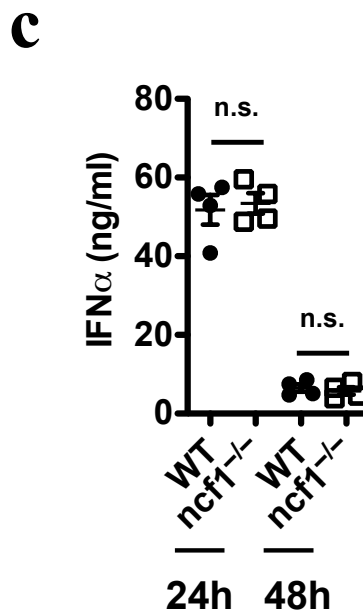

## Supplementary Figure S3

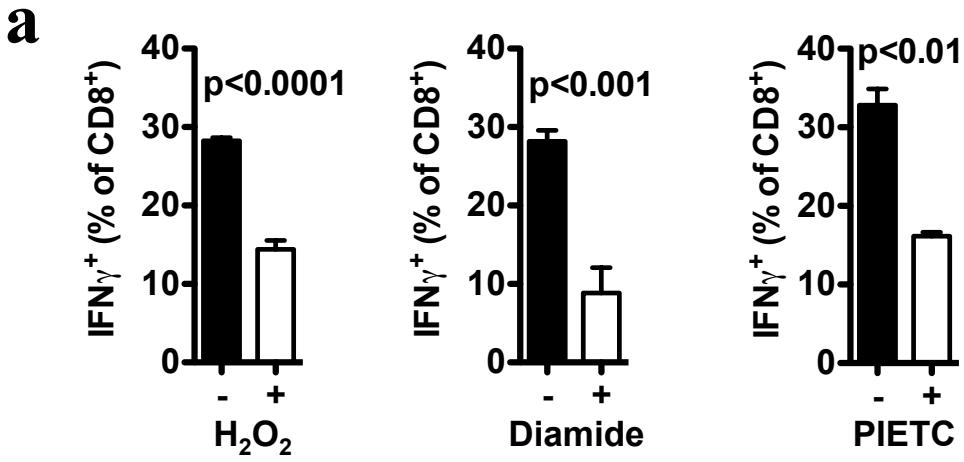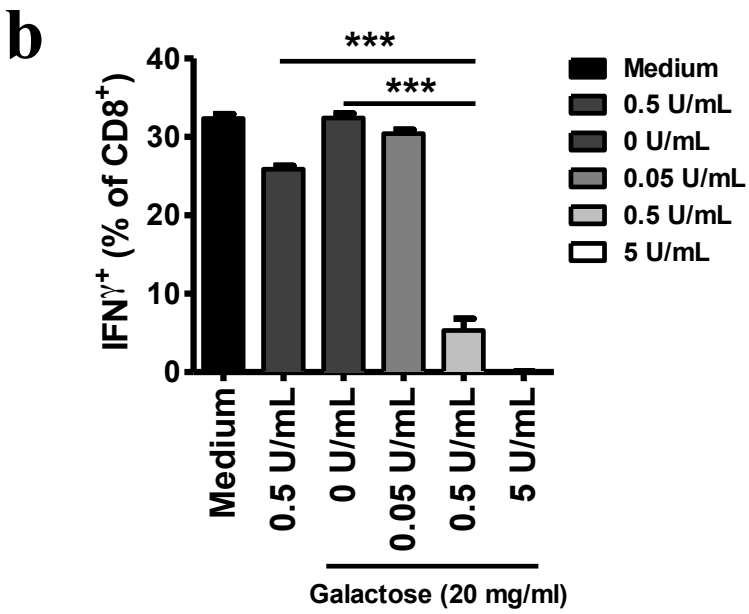

# Supplementary Figure S4

**a**

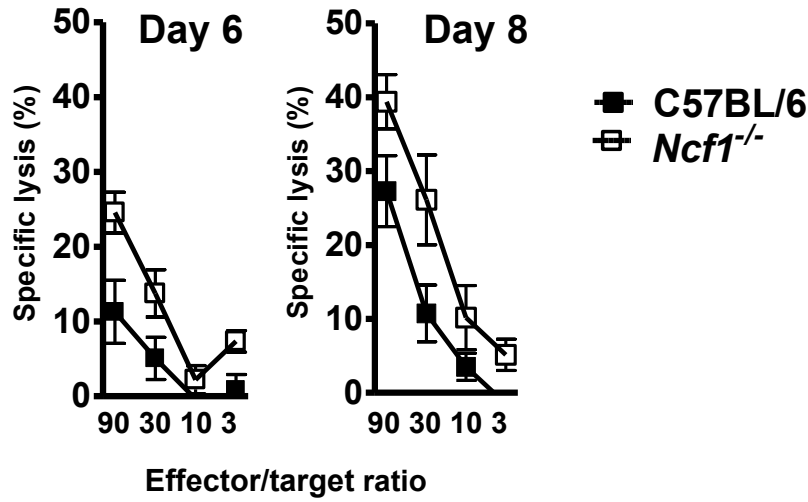

**b**

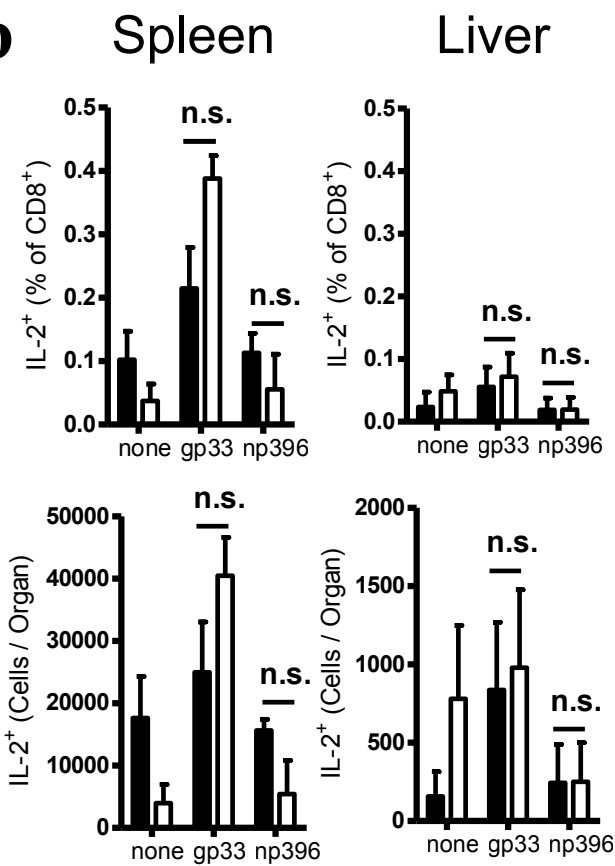

**c**

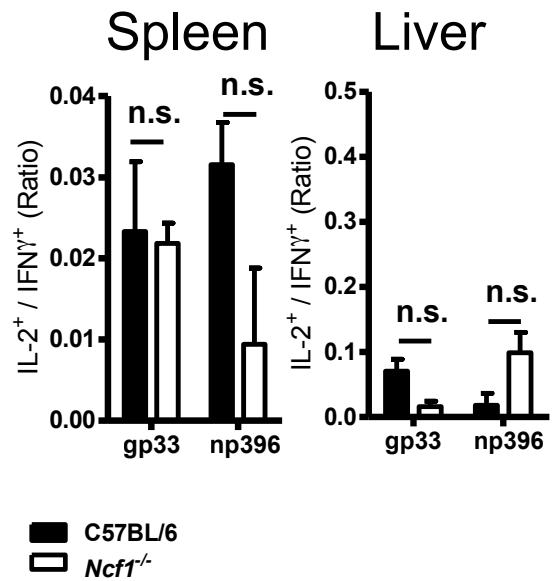

# Supplementary Figure S5

## a Spleen

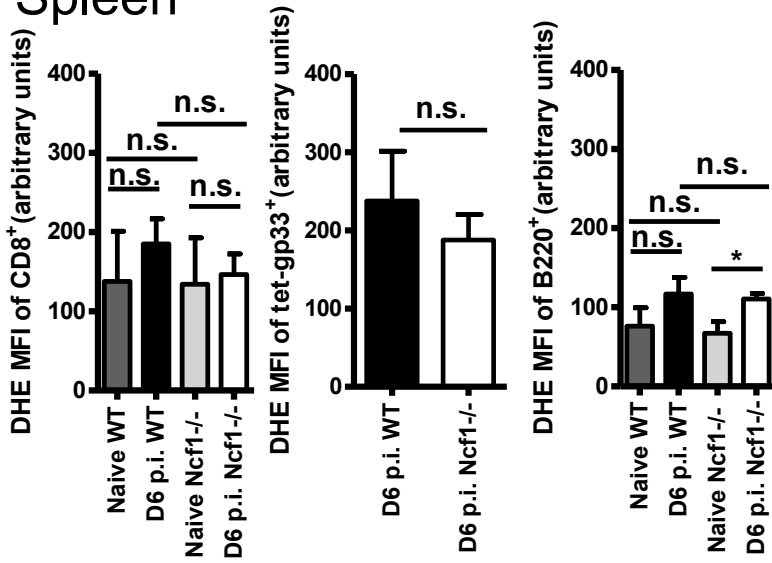

## b Liver

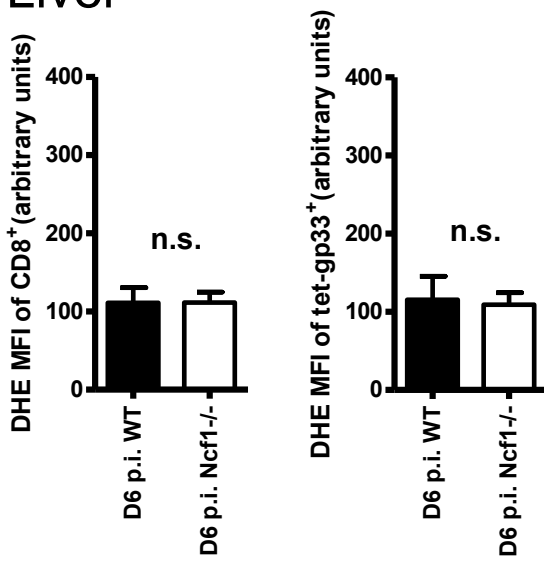

# Supplementary Figure S6

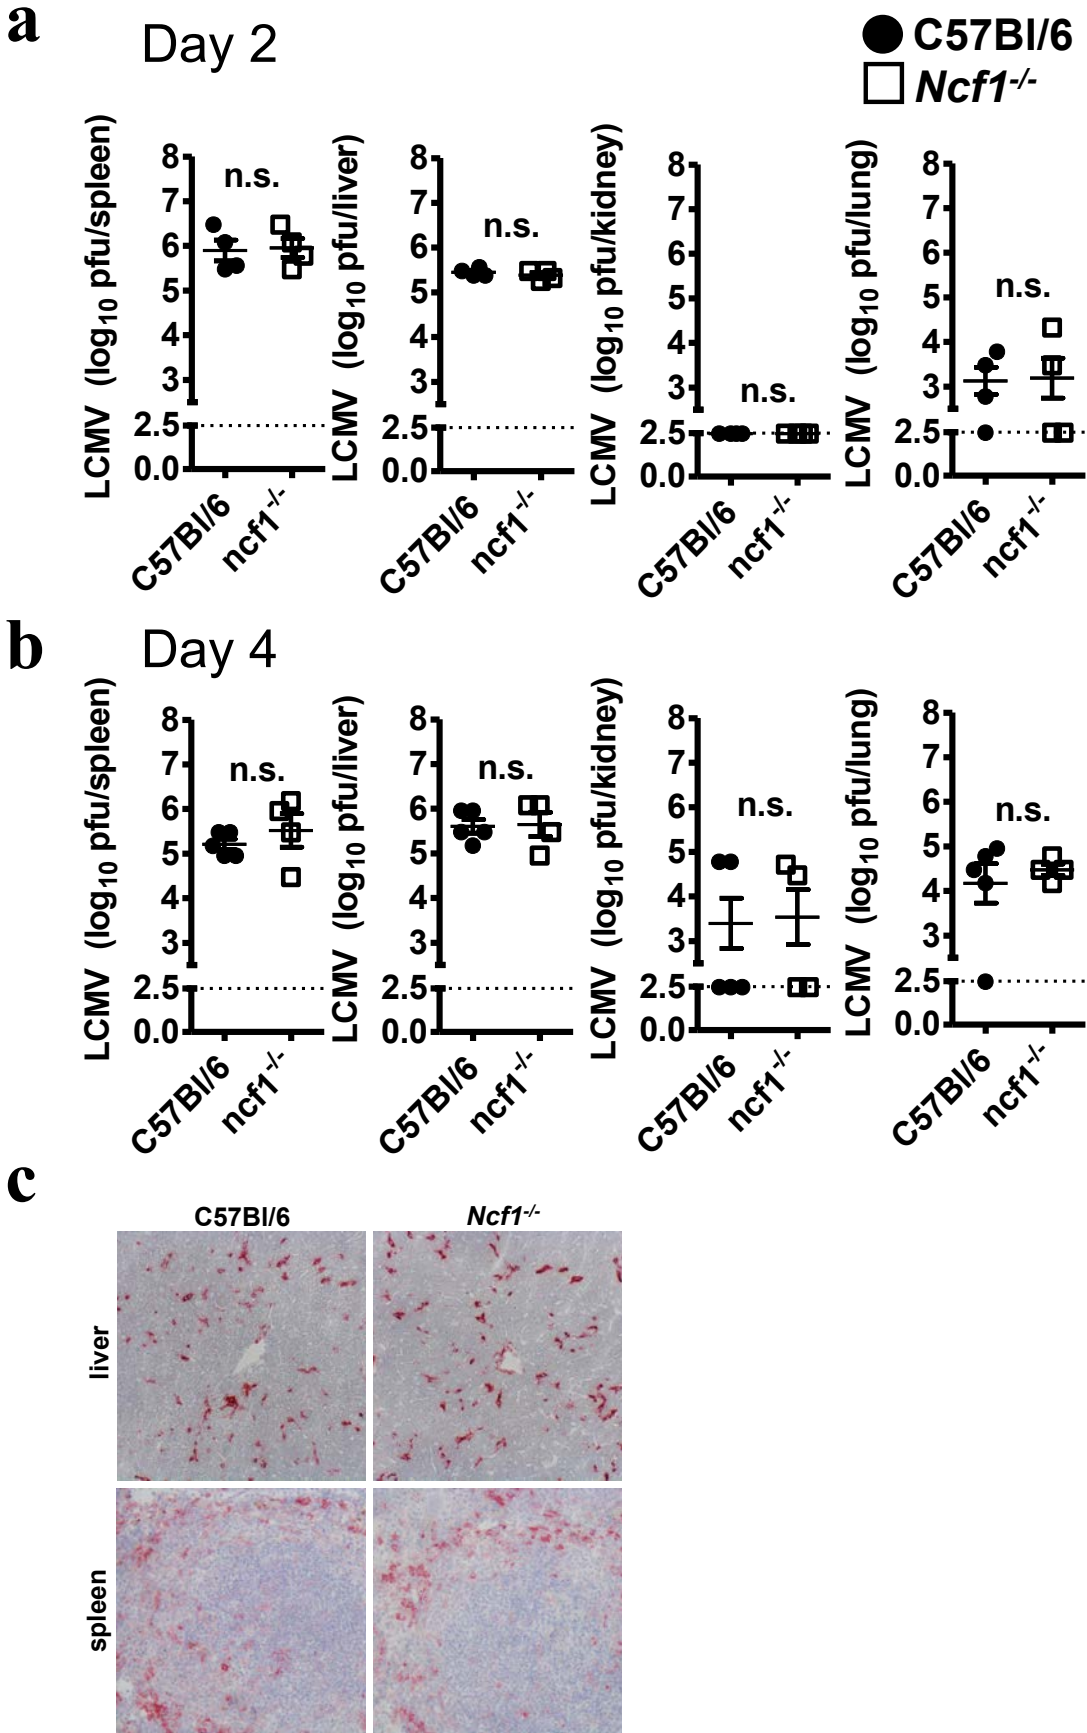

## Supplementary Figure S7

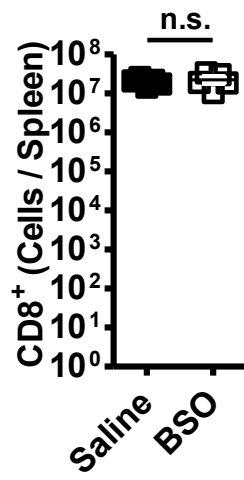

Supplement: cdd2012167x1.pdf [file cdd2012167x1.pdf]
